# Supplementary material for: Self-assembly of azobenzene-based two-component gels
Source: Royal Society of Chemistry journal article supplement (doi:10.1039/c4nj01131g), 2014-01-01
Supplement: c4nj01131g1.pdf [file c4nj01131g1.pdf]

**Supporting information for  
Self-assembly of Azobenzene-based Two-component Gels**

**Yuan Zhang,<sup>a</sup> Pengchong Xue,<sup>\*b</sup> Boqi Yao,<sup>b</sup> Jiabao Sun,<sup>b</sup> Chong Qian,<sup>b</sup> Ran Lu,<sup>b</sup>**

<sup>a</sup> Key Laboratory of Theoretical and Computational Photochemistry, Ministry of Education, College of Chemistry, Beijing Normal University, 19# XinJieKouWai St., HaiDian District, Beijing, (P. R. China)

<sup>b</sup> State Key Laboratory of Supramolecular Structure and Materials, College of Chemistry, Jilin University, 2699# Qianjin Street, Changchun, (P.R. China),

E-mail: [xuepengchong@jlu.edu.cn](mailto:xuepengchong@jlu.edu.cn)

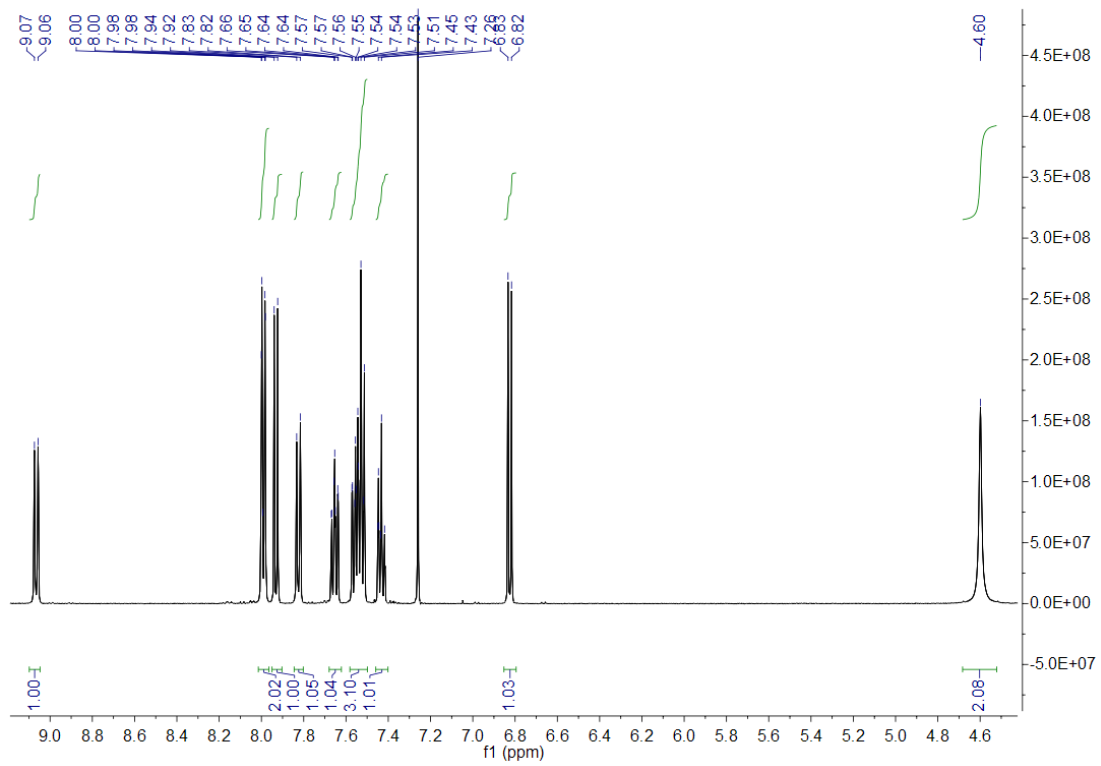

**Fig. S1** <sup>1</sup>H NMR of PDNA in CDCl<sub>3</sub>.

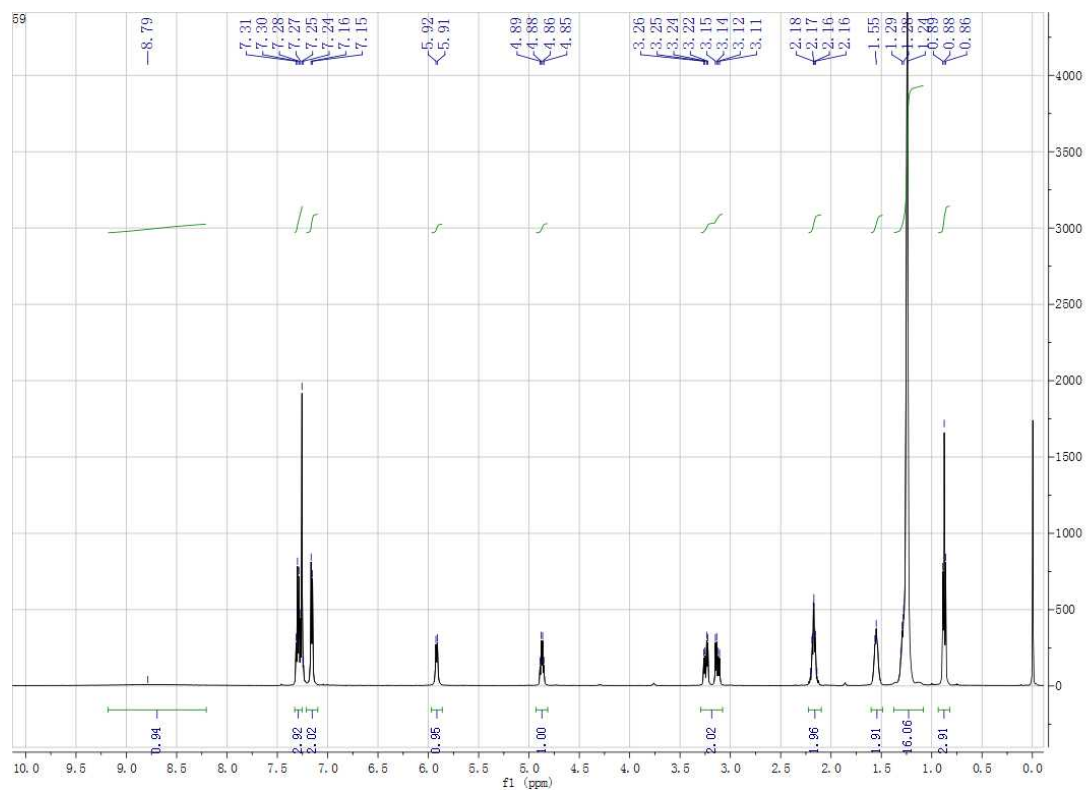

**Fig. S2** <sup>1</sup>H NMR of C12Ph in CDCl<sub>3</sub>.

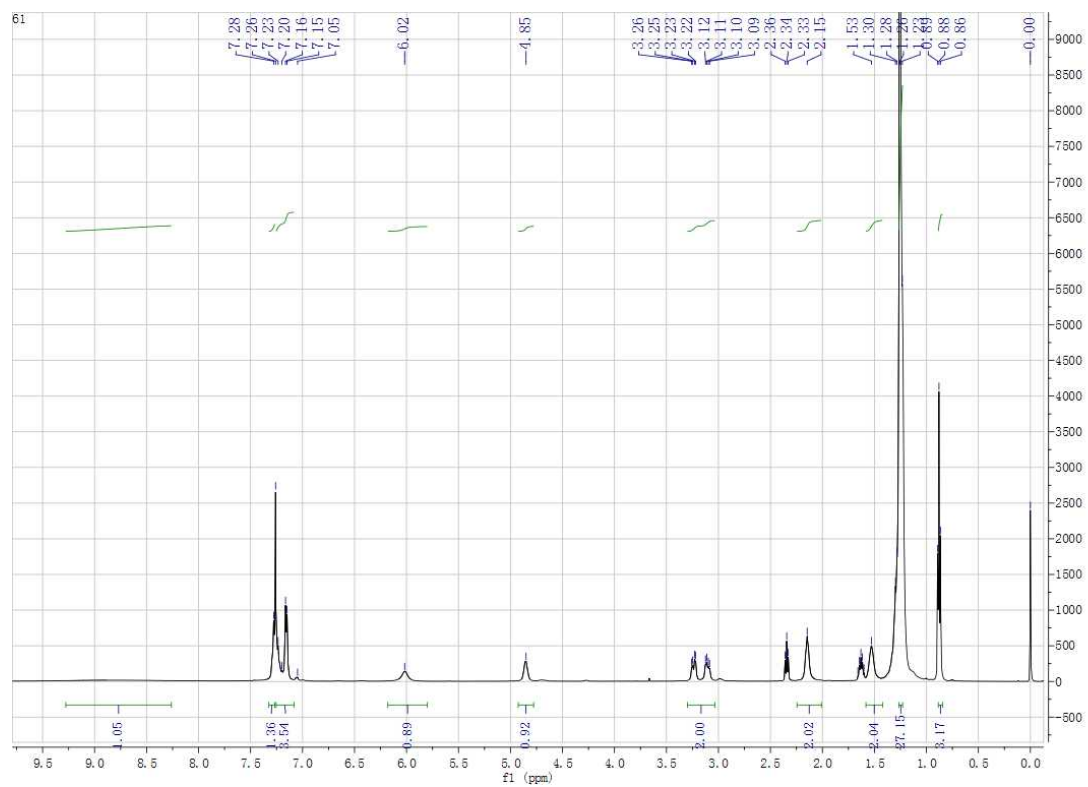

**Fig. S3**  $^1\text{H}$  NMR of C18Ph in  $\text{CDCl}_3$ .

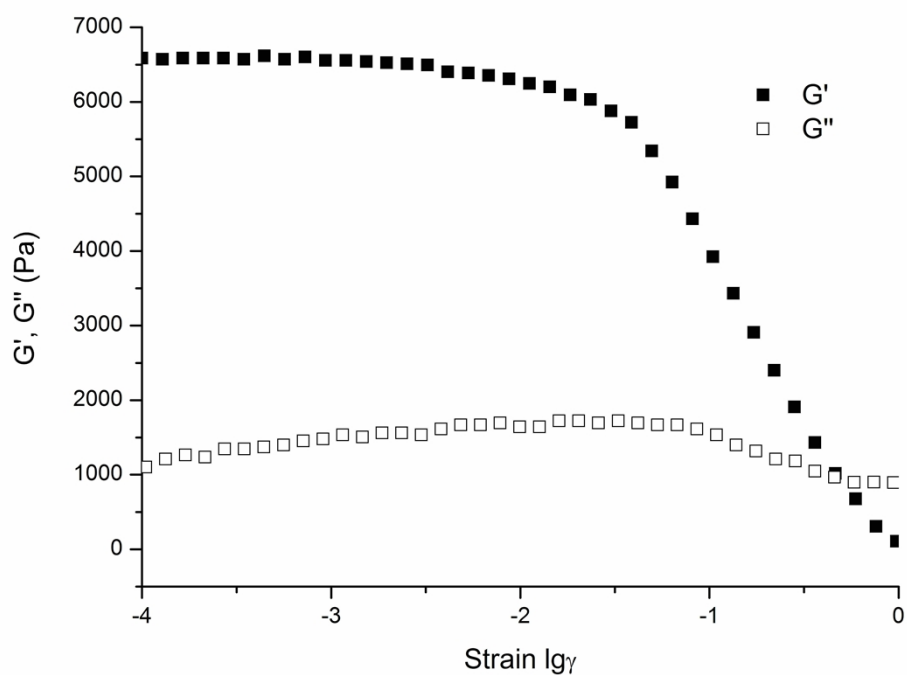

**Fig. S4** Amplitude sweep rheometry data (storage modulus  $G'$  and loss modulus  $G''$  vs shear strain  $\lg\gamma$ ) for the gel (1 :1, 1.0 mg/mL) at 20 °C (angular frequency: 6.28 rad/s).

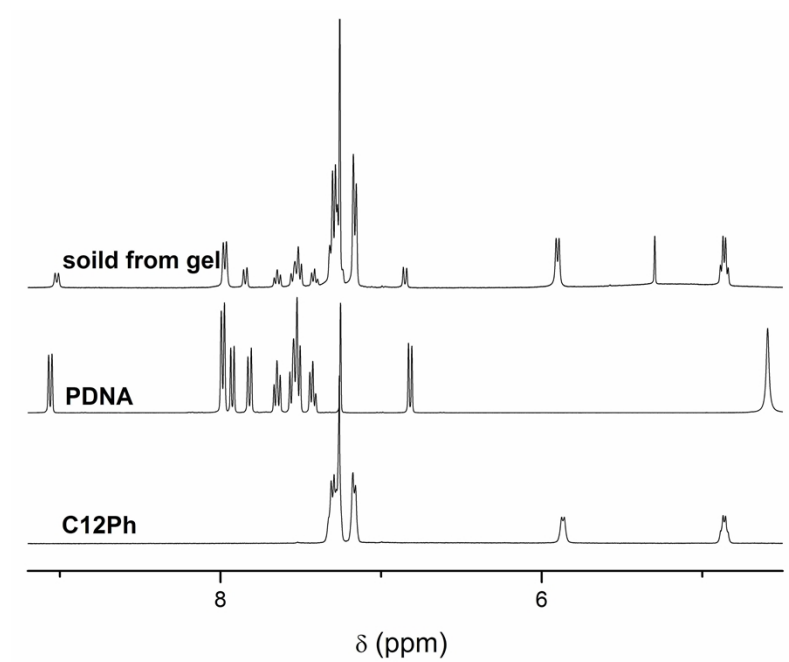

**Fig. S5** <sup>1</sup>H NMR spectra of **C12Ph**, **PDNA**, and the red solid obtained from gel by centrifugation in CDCl<sub>3</sub>.

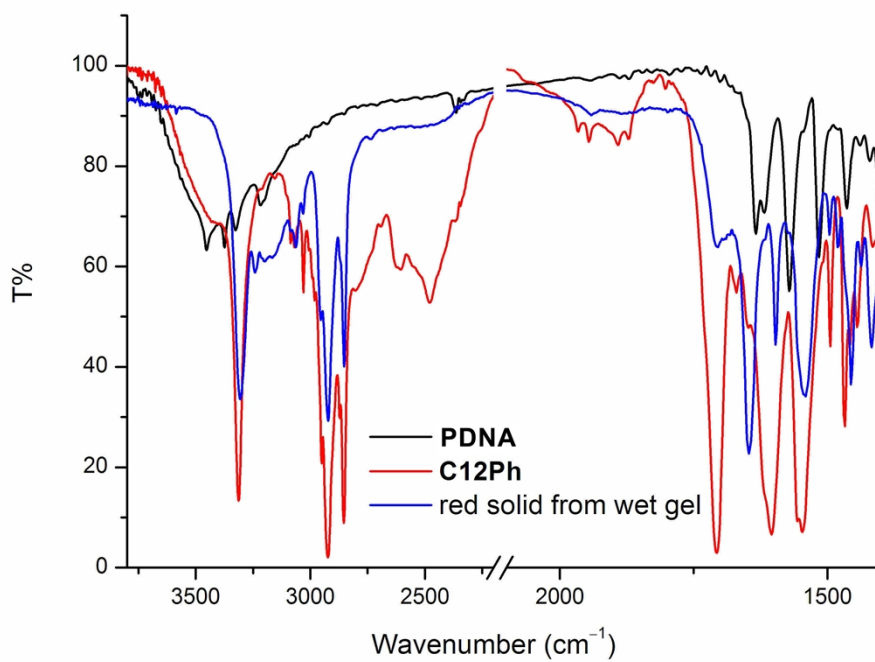

**Fig. S6** IR spectra of **C12Ph** and **PDNA** in solid state, and red solid from wet gel.

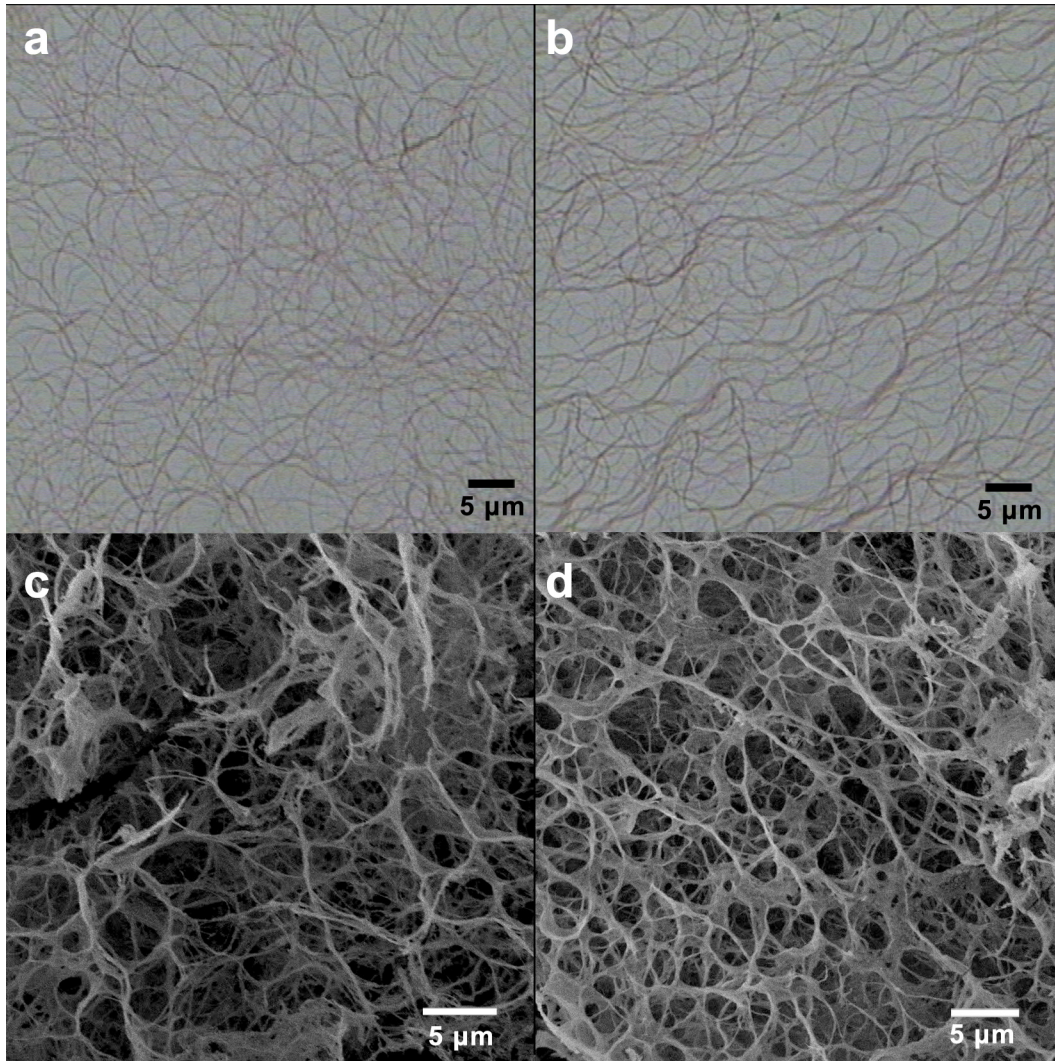

**Fig. S7** Optical microscope (a and b) and SEM (c and d) images of cyclohexane gels for complexes of 3 :1 and 4 :1, respectively.



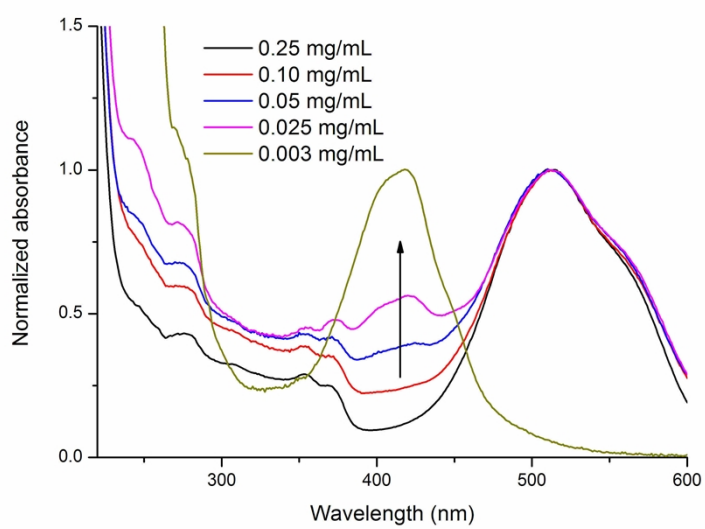

**Fig. S8** Absorption spectra of the complex (**C12Ph/PDNA** = 4/1) in cyclohexane at different concentrations at room temperature.
